# Supplementary material
Source: MDPI journal article supplement (https://www.mdpi.com/2072-4292/15/18/4547)
Supplement: s1 [file s1]

# Supplementary Material

Manuscript title: Methane emissions in boreal forest fire regions: Assessment of five biomass biomass-burning emission inventories based on carbon sensing satellites

Authors: Siyan Zhao, Li Wang, Yusheng Shi, Zhaocheng Zeng, Biswajit Nath, Zheng Niu

Figures: 9

Tables: 4

Total pages: 13

S1 Detrended fluctuation analysis calculation steps and formulas

Figure of Contents:

Figure. S1 Global forest disturbance drivers map.

Figure. S2 Distribution map of CAN regional stations.

Figure. S3 Seasonal box chart of CH<sub>4</sub> emissions from 2010 to 2020 (black hollow circle: mean value, red solid line: median value, black diamond: outlier): (a) CAN; (b) RUS.

Figure. S4 Ground station data and observed remote sensing atmospheric concentration data.

Figure. S5 Correlation analysis between inventory dataset and atmospheric CH<sub>4</sub> concentration data from 2010 to 2020: (a) CAN; (b) RUS.

Figure. S6 Correlation number between atmospheric concentration change and gas emission under optimal lag number (red star represents  $p < 0.01$ ): (a) CAN; (b) RUS.

Table of Contents:

Table. S1 Data collection details.

Table. S2 Characteristics of two atmospheric background stations and MLO stations in the CAN region.

Table. S3 Summary of five biomass burning emission inventories

Table. S4 Average CH<sub>4</sub> emissions and standard deviation in CAN and RUS regions from 2010 to 2020.

## S1 Detrended Fluctuation Analysis calculation steps and formulas

Principle:

Data trend removal refers to subtracting an optimal (least squares) fitting line, plane, or surface from the data, so that the mean of the data after trend removal is zero [1].

General steps:

1. Calculate the cumulative deviation of a time series  $x(t)$  with a length of  $N$ ,  $t=1, 2, \dots, N$ , and Calculate its cumulative deviation and convert it into a new sequence:

$$y(t) = \sum_{i=1}^t [x(i) - \bar{x}] \quad (1)$$

In the equation,  $\bar{x}$  is the average of the time series:  $\bar{x} = \frac{1}{N} \sum_{t=1}^N x(t)$

2. Divide  $y(t)$  into  $m$  non-overlapping intervals of equal length  $n$ , where  $n$  is the interval length, i.e., the time scale, and  $m$  is the number of intervals (or windows), which is the integer part of  $N/n$ .

3. Use the least squares method to linearly fit the local trend  $y_n(t)$  for each segment of the sequence.

4. Remove the local trend of each interval for  $y(t)$  and calculate the root mean square of the new sequence:

$$F(n) = \sqrt{\frac{1}{N} \sum_{t=1}^N [y(t) - y_n(t)]^2} \quad (2)$$

5. Change the size of the window length and repeat steps (2), (3), and (4).

[1] Xu, Z.; Wan, J.W.; Li, G.; Su, F. Target Detection within Sea Clutter Based on Multifractal Detrended Fluctuation Analysis. In Proceedings of the SMART TECHNOLOGIES FOR COMMUNICATION, 2012; pp. 259-262.

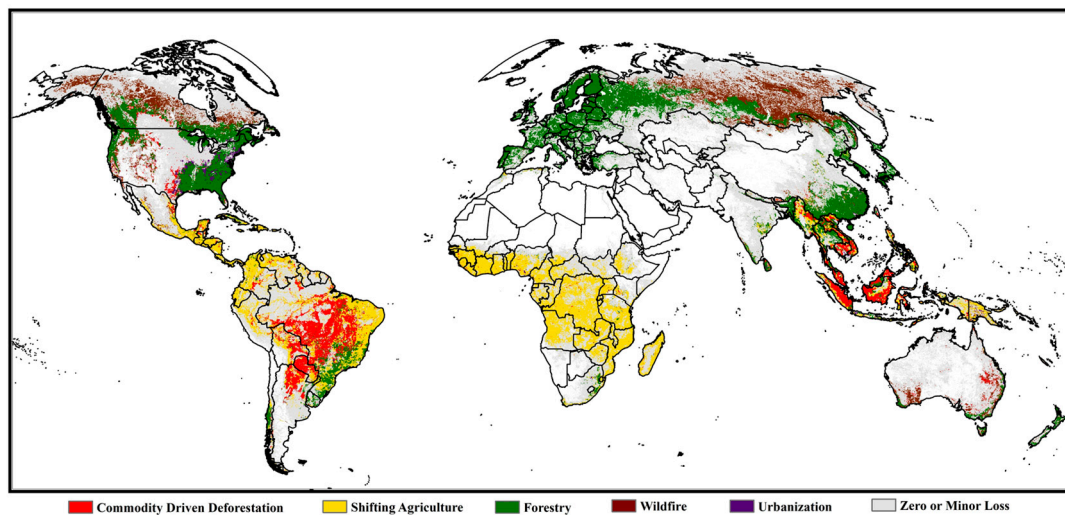

Figure. S1 Global forest disturbance drivers map.

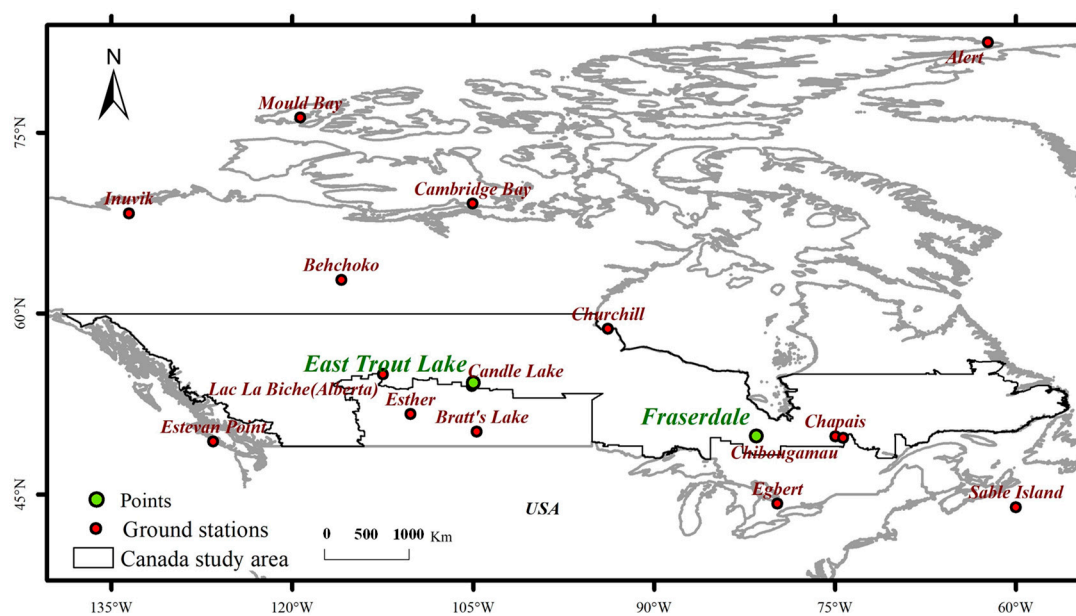

Figure. S2 Distribution map of CAN regional stations.

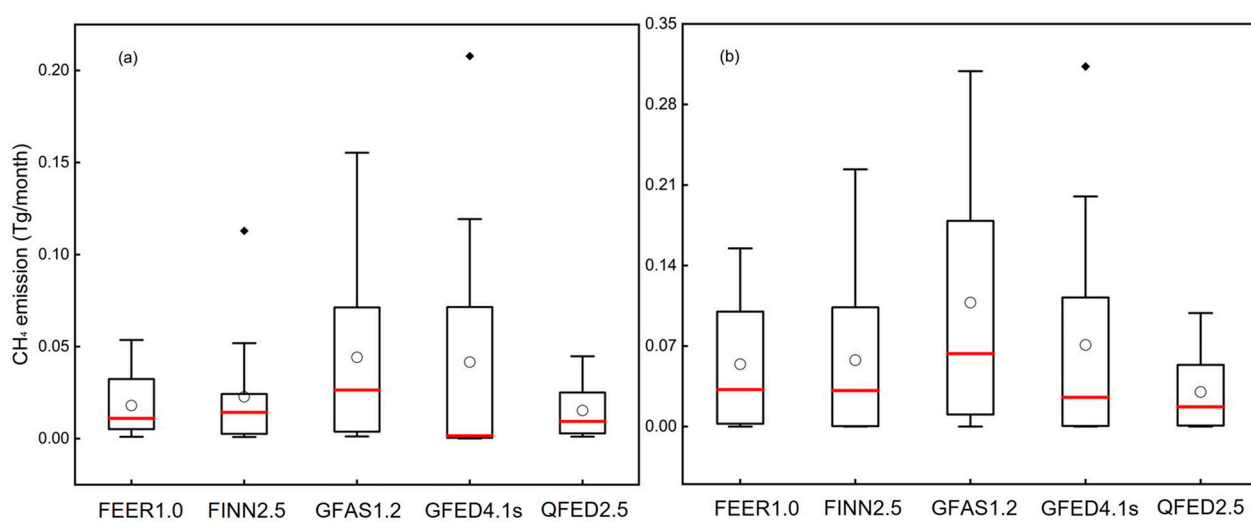

**Figure. S3** Seasonal box chart of CH<sub>4</sub> emissions from 2010 to 2020 (black hollow circle: mean value, red solid line: median value, black diamond: Outlier): (a) CAN; (b) RUS.

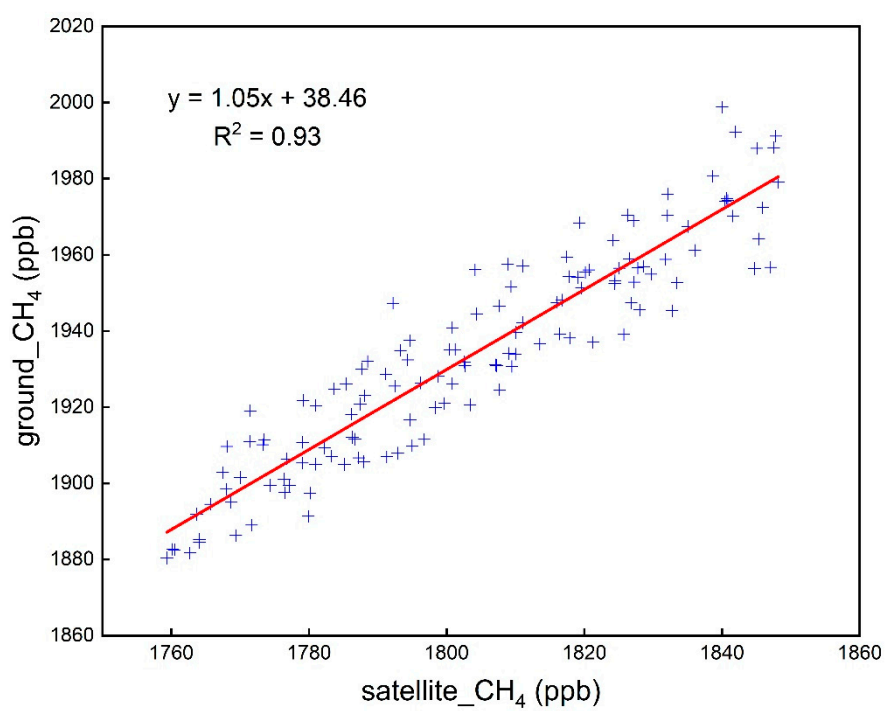

**Figure. S4** Ground station data and observed remote sensing atmospheric concentration data.

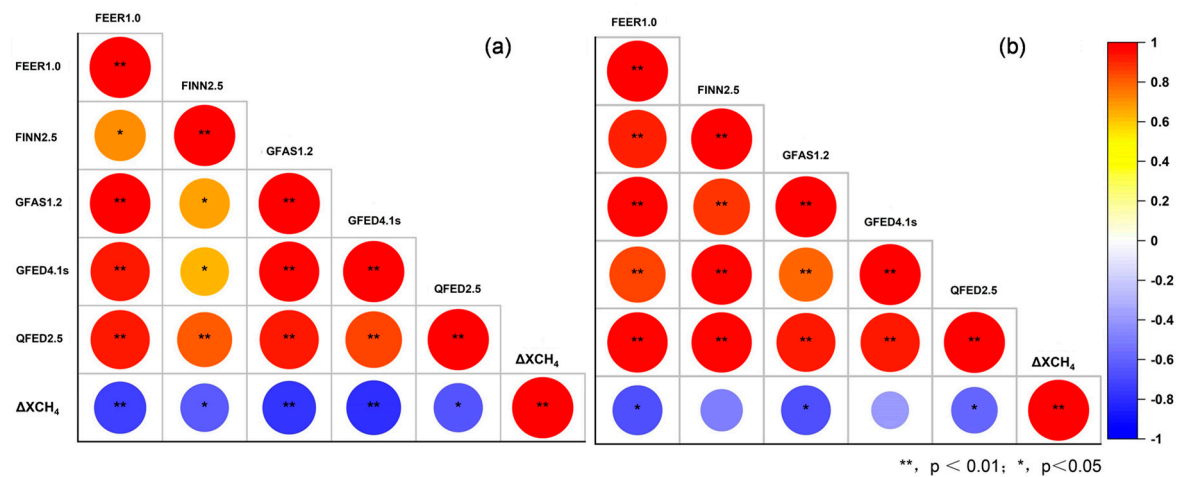

**Figure. S5** Correlation analysis between inventory dataset and atmospheric CH<sub>4</sub> concentration data from 2010 to 2020: (a) CAN; (b) RUS.

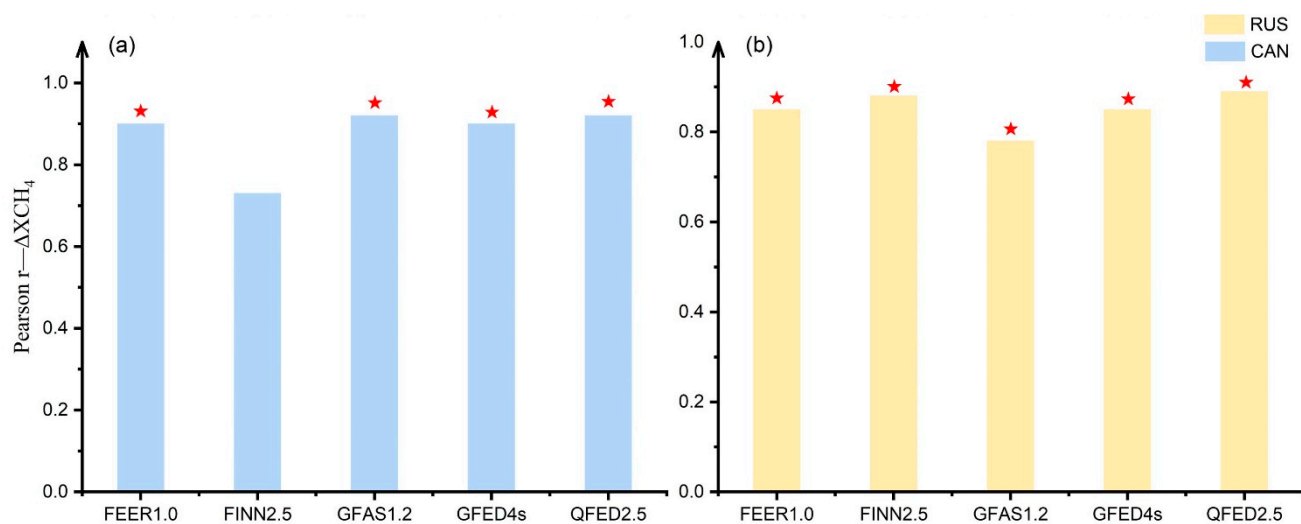

**Figure. S6** Correlation number between atmospheric concentration change and gas emission under optimal lag number (red star represents  $p < 0.01$ ): (a) CAN; (b) RUS.

**Table. S1** Data collection details.

| Data classification            | Data name                | Product name                              | Spatial resolution | Collection time range / Time resolution | Unit                         | Data format | Data sources                                                                                                                                                              |
|--------------------------------|--------------------------|-------------------------------------------|--------------------|-----------------------------------------|------------------------------|-------------|---------------------------------------------------------------------------------------------------------------------------------------------------------------------------|
| CH <sub>4</sub> Satellite data | Mapping-XCH <sub>4</sub> | Atmospheric methane column concentration  | 0.5°               | 2010/01~2020/12 / Monthly               | ppb                          | TIFF        | <a href="https://data.casearth.cn/">https://data.casearth.cn/</a>                                                                                                         |
| Site data                      | CH <sub>4</sub>          | Ground station data                       | /                  | 2010/01~2020/12 / Monthly               | ppb                          | TXT         | <a href="https://gaw.kishou.go.jp/">https://gaw.kishou.go.jp/</a>                                                                                                         |
| GBBEI                          | GFED4.1s                 | CO <sub>2</sub> /CH <sub>4</sub> emission | 0.25°              | 2010/01~2020/12 / Daily                 | kg/m <sup>2</sup> /s         | HDF5        | <a href="https://www.geo.vu.nl/~gwerf/GFED/GFED4/">https://www.geo.vu.nl/~gwerf/GFED/GFED4/</a>                                                                           |
|                                | FINN2.5                  |                                           | 0.1°               |                                         | molecules/cm <sup>2</sup> /s | NetCDF      | <a href="https://rda.ucar.edu/datasets/ds312.9/">https://rda.ucar.edu/datasets/ds312.9/</a>                                                                               |
|                                | GFAS1.2                  |                                           | 0.1°               |                                         | kg/m <sup>2</sup> /s         |             | <a href="https://apps.ecmwf.int/datasets/data/cams-gfas/">https://apps.ecmwf.int/datasets/data/cams-gfas/</a>                                                             |
|                                | FEER1.0                  |                                           | 0.1°               |                                         | kg/m <sup>2</sup> /s         |             | <a href="https://feer.gsfc.nasa.gov/data/">https://feer.gsfc.nasa.gov/data/</a>                                                                                           |
|                                | QFED2.5                  |                                           | 0.1°               |                                         | kg/m <sup>2</sup> /s         |             | <a href="http://ftp.as.harvard.edu/gcgrid/data/ExtData/HEMCO/QFED/">http://ftp.as.harvard.edu/gcgrid/data/ExtData/HEMCO/QFED/</a>                                         |
| Auxiliary data                 | MCD12Q1.061              | Land cover type data                      | 500m               | 2015                                    | /                            | TIFF        | <a href="https://developers.google.com/earth-engine/datasets/catalog/MODIS_061_MCD12Q1">https://developers.google.com/earth-engine/datasets/catalog/MODIS_061_MCD12Q1</a> |



**Table. S2** Characteristics of two atmospheric background stations and MLO stations in the CAN region.

| Sites | Location         | Sample | Underlying surface | Altitude/m | Observation time |
|-------|------------------|--------|--------------------|------------|------------------|
| ETL   | 54.23°N,104.99°W | bottle | forest             | 492        | 2005-now         |
| FSD   | 49.84°N,81.52°W  | bottle | forest             | 210        | 1999-now         |
| MLO   | 19.54°N,155.58°W | bottle | bare land          | 3397       | 1984-now         |

**Table. S3** Summary of five biomass burning emission inventories

| inventory                               | Burned area/FRP product                           | Spatial resolution | Time resolution                | Time range | Reference                |
|-----------------------------------------|---------------------------------------------------|--------------------|--------------------------------|------------|--------------------------|
| <b>(a) Burned-area-based approaches</b> |                                                   |                    |                                |            |                          |
| <b>GFED4.1s</b>                         | MODIS MCD64A1                                     | 0.25° × 0.25°      | 3-hourly,<br>Daily,<br>Monthly | 1997-      | Giglio et al. (2013)     |
| <b>FINNv2.5</b>                         | MCD14DL                                           | 0.1° × 0.1°        | Daily                          | 2002-2021  | Wiedinmyer et al. (2011) |
| <b>(b) FRP-based approaches</b>         |                                                   |                    |                                |            |                          |
| <b>GFASv1.2</b>                         | Assimilation of level 2<br>MOD14 and MYD14<br>FRP | 0.1° × 0.1°        | Daily                          | 2003-      | Whitburn et al. (2015)   |
| <b>FEERv1.0</b>                         | From GFASv1.2                                     | 0.1° × 0.1°        | Daily,<br>Monthly              | 2003-      | Ichoku et al. (2014)     |
| <b>QFEDv2.5</b>                         | Level 2 fire products<br>MOD14/MYD14              | 0.1° × 0.1°        | Daily,<br>Monthly              | 2000-      | Koster et al. (2015)     |

**Table. S4** Average CH<sub>4</sub> emissions and standard deviation in CAN and RUS regions from 2010 to 2020.

| Area | Inventory | Period    | Average<br>(Tg CH <sub>4</sub> year <sup>-1</sup> ) | 1 Standard<br>Deviation<br>(Tg CH <sub>4</sub> year <sup>-1</sup> ) | Coefficient<br>of Variation<br>(%) |
|------|-----------|-----------|-----------------------------------------------------|---------------------------------------------------------------------|------------------------------------|
| CAN  | FEER1.0   | 2010-2020 | 0.22                                                | 0.09                                                                | 41.03                              |
|      | FINN2.5   |           | 0.24                                                | 0.15                                                                | 60.70                              |
|      | GFAS1.2   |           | 0.52                                                | 0.29                                                                | 54.53                              |
|      | GFED4.1s  |           | 0.40                                                | 0.23                                                                | 58.29                              |
|      | QFED2.5   |           | 0.18                                                | 0.07                                                                | 38.96                              |
|      | Average   |           | 0.31                                                | 0.17                                                                | 50.70                              |
| RUS  | FEER1.0   | 2010-2020 | 0.70                                                | 0.32                                                                | 45.13                              |
|      | FINN2.5   |           | 0.74                                                | 0.43                                                                | 58.68                              |
|      | GFAS1.2   |           | 1.27                                                | 0.79                                                                | 62.01                              |
|      | GFED4s    |           | 0.71                                                | 0.43                                                                | 60.91                              |
|      | QFED2.5   |           | 0.36                                                | 0.16                                                                | 43.77                              |
|      | Average   |           | 0.76                                                | 0.43                                                                | 54.10                              |
